# Supplementary material for: An oxygen-deficient vanadium oxide@N-doped carbon heterostructure for sodium-ion batteries: insights into the charge storage mechanism and enhanced reaction kinetics
Source: Royal Society of Chemistry journal article supplement (doi:10.1039/c9ta11965e), 2020-01-01
Supplement: c9ta11965e1.pdf [file c9ta11965e1.pdf]

## Supporting Information

### **Oxygen-deficient vanadium oxides@N-doped carbon heterostructure for sodium-ion batteries: insights into charge storage mechanism and enhanced reaction kinetics**

*Qingyuan Ren <sup>a</sup>, Ning Qin <sup>b</sup>, Bin Liu <sup>c</sup>, Yuan Yao <sup>d</sup>, Xu Zhao <sup>e</sup>, Zhao Deng <sup>a</sup>, Yu Li <sup>a</sup>, Yucheng Dong <sup>c</sup>,  
Dong Qian <sup>f</sup>, Bao-Lian Su <sup>a,g,\*</sup>, Wenjun Zhang <sup>c,\*</sup>, Hong-En Wang <sup>a,h,\*</sup>*

<sup>a</sup> State Key Laboratory of Advanced Technology for Materials Synthesis and Processing, Wuhan University of Technology, Wuhan, China. Email: [hongenwang@whut.edu.cn](mailto:hongenwang@whut.edu.cn)

<sup>b</sup> Department of Materials Science and Technology, Southern University of Science and Technology (SUSTC), Shenzhen, China.

<sup>c</sup> Center Of Super Diamond & Advanced Films (COSDAF) and Department of Materials Science and Engineering, City University of Hong Kong, HKSAR, China. Email: [apwjzh@cityu.edu.hk](mailto:apwjzh@cityu.edu.hk)

<sup>d</sup> Beijing National Laboratory of Condensed Matter Physics, Institute of Physics, Chinese Academy of Sciences, Beijing 100190, China

<sup>e</sup> Institute of Chemical Materials, Chinese Academy of Engineering Physics, Mianyang 621900, China

<sup>f</sup> College of Chemistry and Chemical Engineering, Central South University, Changsha 410083, China.

<sup>g</sup> Laboratory of Inorganic Materials Chemistry (CMI), University of Namur, 61 rue de Bruxelles, Belgium. Email: [bao-lian.su@unamur.be](mailto:bao-lian.su@unamur.be)

<sup>h</sup> College of Physics and Electronics Information, Yunnan Normal University, Kunming 650500. Email: [hongen.wang@outlook.com](mailto:hongen.wang@outlook.com)

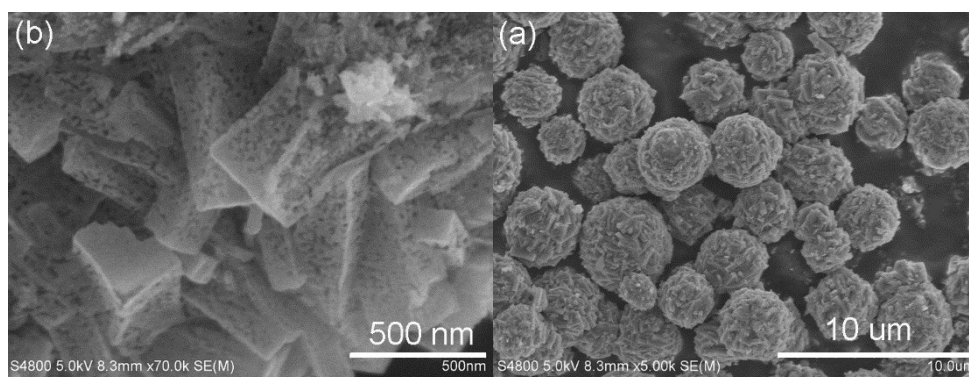

**Fig. S1.** SEM images of the VC product, showing porous spherical morphology with a hierarchical structure.

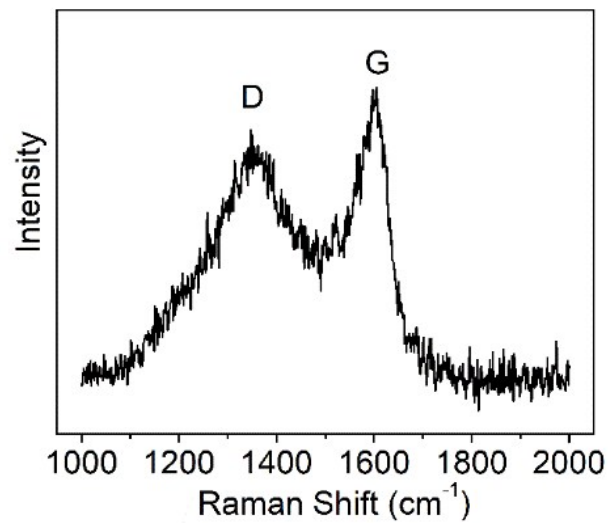

**Fig. S2.** Raman spectrum of VNC sample, indicating the presence of carbon species.

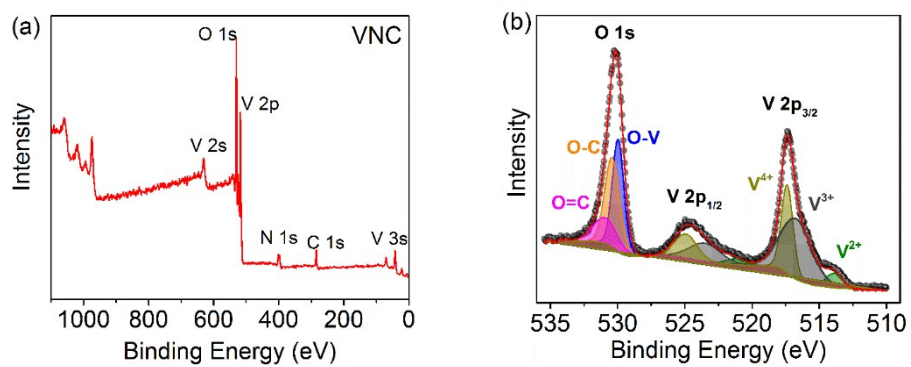

**Fig. S3.** (a) Survey and (b) high-resolution O 1s and V 2p XPS spectra of VNC sample.

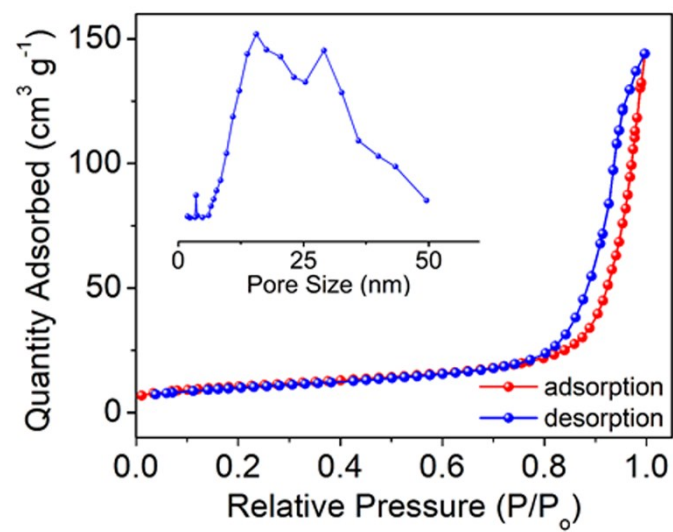

**Fig. S4.**  $\text{N}_2$  adsorption/desorption isotherm curves and pore size distribution plot (inset) of vanadium oxides@N-doped C hybrid sample.

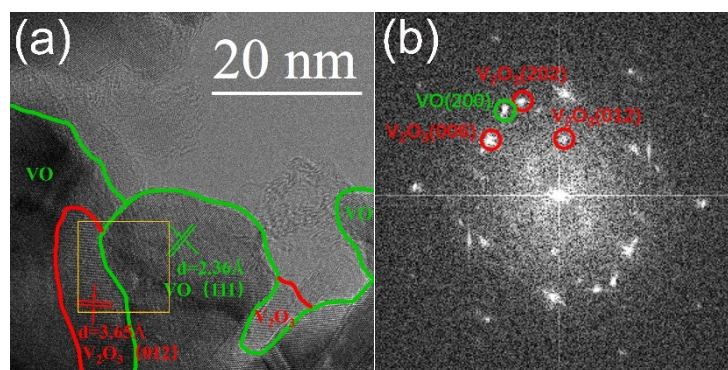

**Fig. S5.** HRTEM (a) and FFT pattern (b) derived from the dark-yellow square region in (a) of the VNC sample, showing the coexistence of VO and V<sub>2</sub>O<sub>3</sub> nanocrystals as marked by green and red, respectively.

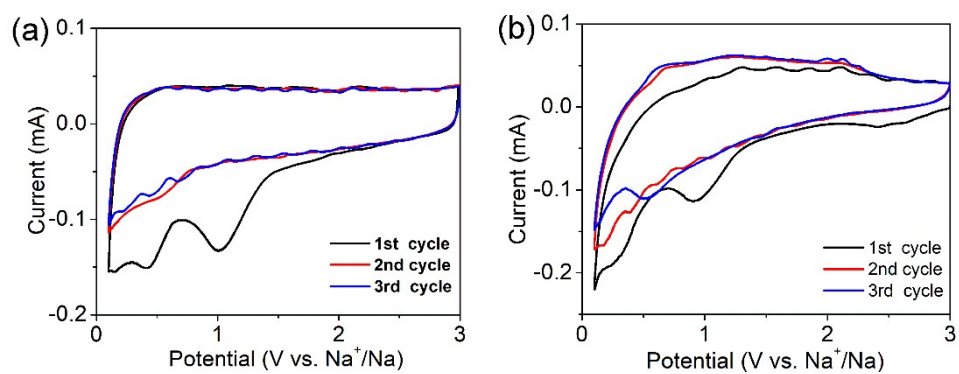

**Fig. S6.** Cyclic voltammetry (CV) curves of the VNC (a) and VC (b) electrodes in Na-half cells at 0.2 mV s<sup>-1</sup> in the first three cycles.

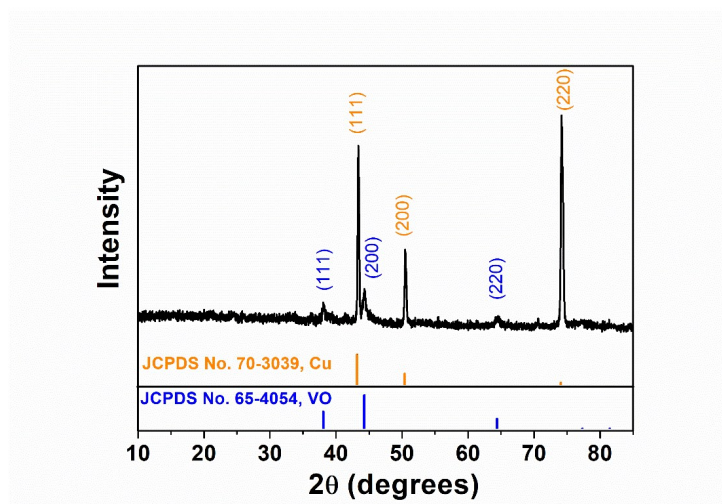

**Fig. S7.** Ex-situ XRD pattern of the VNC electrode after discharge, indicating the incomplete conversion reaction of vanadium oxides during discharge.



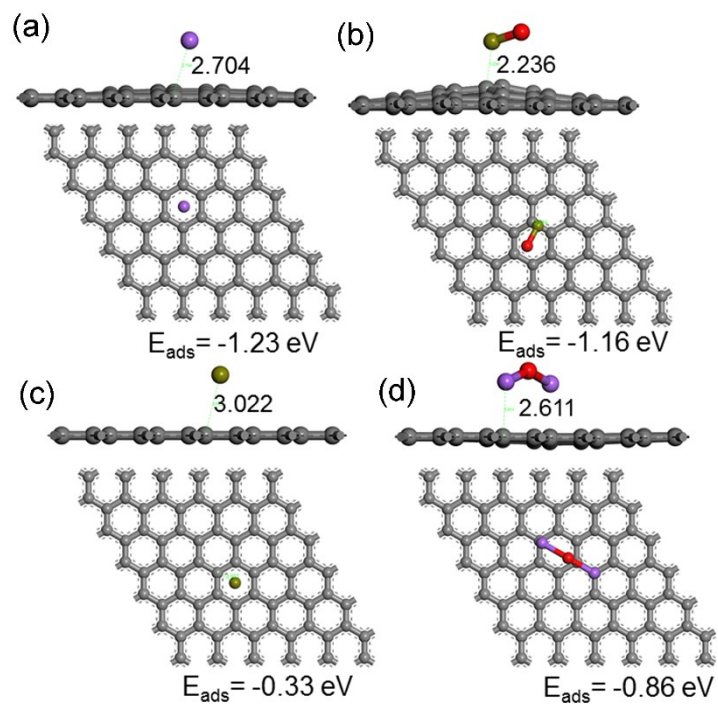

**Fig. S8.** Optimized geometry structures of Na (a), VO (b), V (c), and  $\text{Na}_2\text{O}$  (d) on pristine graphene basal plane. The corresponding adsorption energies ( $E_{\text{ads}}$ ) and some representative bond lengths (all with unit of Å) are also shown.

**Table S1.** Electrochemical performance comparison of our sample with some representative anode materials for SIBs in recent literature.

|                                                     | Capacity                | Capacity                  | Capacity                 | Capacity                 | Capacity                 | Capacity                 |
|-----------------------------------------------------|-------------------------|---------------------------|--------------------------|--------------------------|--------------------------|--------------------------|
| Electrodes                                          | (mAh g <sup>-1</sup> at | (mAh g <sup>-1</sup> at   | (mAh g <sup>-1</sup> at  | (mAh g <sup>-1</sup> at  | (mAh g <sup>-1</sup>     | (mAh g <sup>-1</sup>     |
|                                                     | 0.1 A g <sup>-1</sup> ) | 0.2 A g <sup>-1</sup> )   | 0.5 A g <sup>-1</sup> )  | 1 A g <sup>-1</sup> )    | at 2 A g <sup>-1</sup> ) | at 5 A g <sup>-1</sup> ) |
| <b>Our work</b>                                     | <b>260</b>              | <b>222</b>                | <b>204.5</b>             | <b>191.6</b>             | <b>177.5</b>             | <b>166.5</b>             |
| porous                                              | 247                     | 202                       | 176                      | 164                      | 149                      | NA                       |
| V <sub>2</sub> O <sub>3</sub> /C <sup>15</sup>      |                         |                           |                          |                          |                          |                          |
| M-V <sub>2</sub> O <sub>3</sub> <sup>27</sup>       | 284                     | 242                       | 200                      | 167                      | 136                      | NA                       |
| V <sub>2</sub> O <sub>3</sub> /N-doped              | 240                     | 233                       | 215                      | 185                      | 170                      | 165                      |
| Carbon <sup>26</sup>                                |                         |                           |                          |                          |                          | (3 A g <sup>-1</sup> )   |
| VO <sub>2</sub> /MX-1 <sup>30</sup>                 | 297                     | 278                       | 265                      | 242                      | 206                      | NA                       |
|                                                     |                         |                           | (0.4 A g <sup>-1</sup> ) | (0.8 A g <sup>-1</sup> ) | (1.6 A g <sup>-1</sup> ) |                          |
| V <sub>2</sub> O <sub>3</sub> /NG <sup>17</sup>     | 193                     | 171                       | 150                      | 130                      | 115                      | NA                       |
| HCF-V <sub>2</sub> O <sub>5</sub> <sup>31</sup>     | 190                     | 146                       | 112                      | 77                       | NA                       | NA                       |
| TiO <sub>2</sub> @NFG <sup>6</sup>                  | NA                      | 205                       | 190                      | 170                      | 157                      | 140                      |
|                                                     |                         | (0.25 A g <sup>-1</sup> ) |                          |                          |                          |                          |
| TiO <sub>2</sub> /C HRTs <sup>32</sup>              | NA                      | 225.6                     | 210.3                    | 191.9                    | 168.6                    | 141                      |
| a-Ti <sub>3</sub> C <sub>2</sub> MNRS <sup>33</sup> | 108                     | 93                        | 85                       | NA                       | NA                       | NA                       |
|                                                     |                         |                           | (0.3 A g <sup>-1</sup> ) |                          |                          |                          |
| Amorphous                                           | 250                     | 205                       | 138                      | 100                      | 81                       | NA                       |
| Carbon <sup>34</sup>                                | (0.06 A g <sup>-1</sup> | (0.3 A g <sup>-1</sup> )  | (1.2 A g <sup>-1</sup> ) | (2.4 A g <sup>-1</sup> ) | (4.8 A g <sup>-1</sup> ) |                          |

| 1)                       |    |     |     |     |     |     |
|--------------------------|----|-----|-----|-----|-----|-----|
| 1D CNF <sup>35</sup>     | NA | 272 | 221 | 183 | 145 | 117 |
| (2.5 A g <sup>-1</sup> ) |    |     |     |     |     |     |

NA: not available

**Table S2.** Capacity retention comparison of our sample with some representative anode materials for SIBs in recent literature.

|                                               | Capacity                                                 | Capacity                                                     | Capacity          | Refs             |
|-----------------------------------------------|----------------------------------------------------------|--------------------------------------------------------------|-------------------|------------------|
| Electrodes                                    | (mAh g <sup>-1</sup> at 1 A g <sup>-1</sup> for 1 cycle) | (mAh g <sup>-1</sup> at 1 A g <sup>-1</sup> for 1000 cycles) | retention rate(%) |                  |
| <b>Our work</b>                               | <b>214</b>                                               | <b>152</b>                                                   | <b>71</b>         | <b>This work</b> |
| porous                                        | 181                                                      | 133                                                          | 73.5              | 15               |
| V <sub>2</sub> O <sub>3</sub> /C              | (2 A g <sup>-1</sup> )                                   | (2 A g <sup>-1</sup> for 1000 cycles)                        |                   |                  |
| V <sub>2</sub> O <sub>3</sub> /N-doped carbon | 180.9                                                    | 134.5<br>(3000 cycles)                                       | 74.4              | 26               |
| VO <sub>2</sub> /MX-1                         | 185.5                                                    | 143.0<br>(200 cycles)                                        | 77.1              | 30               |
| HCF-V <sub>2</sub> O <sub>5</sub>             | 368<br>(0.1 A g <sup>-1</sup> )                          | 184<br>(0.1 A g <sup>-1</sup> for 100 cycles)                | 50                | 31               |
| a-Ti <sub>3</sub> C <sub>2</sub>              | 75                                                       | 50                                                           | 66.7              | 33               |
| MNRs                                          | (0.2A g <sup>-1</sup> )                                  | (0.2 A g <sup>-1</sup> for 500 cycles)                       |                   |                  |
| ReS <sub>2</sub> /N-CNFs                      | 350<br>(0.1 A g <sup>-1</sup> )                          | 245<br>(0.1 A g <sup>-1</sup> for 800 cycles)                | 70                | 38               |
| TiO <sub>2</sub> @C                           | 135.4                                                    | 92.9                                                         | 68.6              | 37               |
| nanosheets                                    | (5 A g <sup>-1</sup> )                                   | (5 A g <sup>-1</sup> for 4000 cycles)                        |                   |                  |
| N@S-                                          | 520                                                      | 379                                                          | 73                | 36               |

---

|        |                          |                                         |
|--------|--------------------------|-----------------------------------------|
| Carbon | (0.1 A g <sup>-1</sup> ) | (0.1 A g <sup>-1</sup> for 1000 cycles) |
|--------|--------------------------|-----------------------------------------|

---
